# Supplementary material for: Rapid inoculation of single bacteria into parallel picoliter fermentation chambers
Source: Royal Society of Chemistry journal article supplement (doi:10.1039/c4ay02257b), 2014-10-15
Supplement: c4ay02257b1.pdf [file c4ay02257b1.pdf]

## Supplemental Material

### Rapid inoculation of single bacteria into parallel picoliter fermentation chambers

Christopher Probst<sup>†</sup>, Alexander Grünberger<sup>†</sup>, Nadja Braun, Stefan Helfrich, Katharina Nöh, Wolfgang Wiechert and Dietrich Kohlheyer<sup>\*</sup>

Institute of Bio- and Geosciences, IBG-1: Biotechnology, Forschungszentrum Jülich GmbH, 52425 Jülich, Germany

<sup>†</sup>These authors contributed equally to this work

<sup>\*</sup>Corresponding author: Dr. Dietrich Kohlheyer

E-mail: [d.kohlheyer@fz-juelich.de](mailto:d.kohlheyer@fz-juelich.de)

Phone: +49 2461 61 2875

Fax: +49 2461 61 3870

Keywords: air bubble, cell inoculation, microfluidics, single-cell cultivation, single-cell analysis

### S1. Capillary force calculation

The pressure ( $p_c$ ) generated by the capillary force can be expressed by Equation S 1:

$$p_c = -\gamma_{lg} \left( \cos \theta \frac{dA_{sl}}{dV_1} - \frac{dA_{lg}}{dV_1} \right) \quad \text{Equation S 1}$$

where  $\gamma_{lg}$  refers to the surface tension of the liquid,  $\theta$  to the contact angle,  $A_{sl}$  to the solid/liquid interfacial area,  $A_{lg}$  to the liquid/gas interface interfacial area and  $V_1$  to the liquid volume of the channel.

For a rectangular channel with constant cross-section and  $w \gg h$ , the Young-Laplace equation can be obtained (Equation S 2).

$$p_c = -\gamma_{lg} \cos \theta \left( \frac{2}{h} \right) \quad \text{Equation S 2}$$

The pressure of one subchannel ( $p_c$ ) with a height of 10  $\mu\text{m}$ , a surface tension  $\gamma = 0.07 \text{ Nm}^{-1}$  and a contact angle  $\theta = 111^\circ$  induced by capillary force was found to be approximately 120 mbar using Equation S 2. Thus the fivefold capillary pressure of 600 mbar pushes the injected air bubble into its operational position.

## S2. Fitting of experimental data

Fitting of the experimentally obtained data for the air bubble removal was done accordingly to Kang et al.<sup>31</sup> Based on the gas permeation, Equation S3 was derived for the shrinkage of the bubble cross-sectional area  $A$  over time.

$$A(t) = c_1 \exp\left(\frac{aP(p_1 - p_2)}{hb} \frac{T * 76}{273P_{atm}} t\right) + c_2 \quad \text{Equation S 3}$$

Appropriate values for the permeability  $P$ , channel height  $h$ , membrane thickness  $b$  and temperature  $T$  were chosen based on the material and geometry. The constants  $c_1$ ,  $c_2$  and  $a$  were obtained from fitting Equation S 3 to the experimental values.

The values derived for  $c_1$ ,  $c_2$  and  $a$  by Equation S 3 are depicted in Table S 1 for  $P = 1.92 \times 10^{-15} \text{ m}^2 \text{ s}^{-1} \text{ Pa}^{-1}$ ,  $h = 1 \times 10^{-3} \text{ cm}$ ,  $b = 0.3 \text{ cm}$ ,  $P_{atm} = 76 \text{ cm Hg}$ , and  $T = 298 \text{ K}$ .

Table S 1: Values of  $c_1$ ,  $c_2$  and  $a$  derived from experimental data at 300 mbar, 400 mbar and 500 mbar with  $P = 1.92 \times 10^{-15} \text{ m}^2 \text{ s}^{-1} \text{ Pa}^{-1}$ ,  $h = 1 \times 10^{-3} \text{ cm}$ ,  $b = 0.3 \text{ cm}$ ,  $P_{atm} = 76 \text{ cmHg}$ , and  $T = 298 \text{ K}$ .

| $p$ [mbar] | $c_1$    | $c_2$    | $a$       |
|------------|----------|----------|-----------|
| 300        | 9.92e+03 | 5.73e+07 | -1.49e+03 |
| 400        | 5.74e+03 | 5.29e+07 | -1.80e+03 |
| 500        | 3.80e+03 | 9.09e+07 | -8.15e+02 |
